# Supplementary material for: Aryl azo imidazoles assisted assembly of anion/anion–water through salt formation
Source: Royal Society of Chemistry journal article supplement (doi:10.1039/b912454c), 2009-09-07
Supplement: b912454c.pdf [file b912454c.pdf]

**Aryl azo imidazoles assisted assembly of anion/anion-water through  
Salt formation**

*Avijit Pramanik, Subhojit Majumdar, Gopal Das\**

Department of Chemistry, Indian Institute of Technology Guwahati, Assam, 781 039, India

gdas@iitg.ernet.in

E-mail: gdas@iitg.ernet.in, Tel.: +91-361-258-2313; Fax: +91-361-258-2349

**SUPPORTING INFORMATION**

**Table S1.** Selected bond length and bond angles.

| <b>Salt 1</b>        |                     |                     |                    |
|----------------------|---------------------|---------------------|--------------------|
| Br2 C16 1.889(3)     | C14 C15 1.387(5)    | N8 N7 1.101(4)      | C3 C2 1.334(5)     |
| Br1 C7 1.887(3)      | C13 N8 1.632(5)     | C7 C8 1.373(5)      | C3 N2 1.367(4)     |
| S1 C19 1.604(5)      | C12 C11 1.325(5)    | C7 C6 1.384(5)      | C1 N1 1.309(5)     |
| C16 C15 1.375(5)     | C12 N5 1.344(4)     | C9 C4 1.377(6)      | C1 N2 1.331(5)     |
| C16 C17 1.386(5)     | C10 N5 1.284(5)     | C9 C8 1.401(5)      | C1 N3 1.537(5)     |
| C17 C18 1.352(6)     | C10 N6 1.323(5)     | C6 C5 1.369(5)      | C2 N1 1.350(4)     |
| C18 C13 1.366(6)     | C10 N7 1.643(5)     | C5 C4 1.358(6)      | N4 N3 1.129(4)     |
| C14 C13 1.372(6)     | C11 N6 1.359(5)     | C4 N4 1.584(5)      | C19 N9 1.151(4)    |
| C15 C16 C17 120.9(3) | N5 C10 N6 111.5(4)  | C6 C7 Br1 119.1(3)  | N1 C1 N2 110.9(3)  |
| C15 C16 Br2 119.5(3) | N5 C10 N7 114.6(4)  | C4 C9 C8 120.0(4)   | N1 C1 N3 115.9(4)  |
| C17 C16 Br2 119.7(3) | N6 C10 N7 133.8(5)  | C5 C6 C7 119.9(4)   | N2 C1 N3 133.0(4)  |
| C18 C17 C16 120.6(4) | C12 C11 N6 106.0(4) | C4 C5 C6 120.5(4)   | C3 C2 N1 109.3(3)  |
| C17 C18 C13 119.3(4) | N7 N8 C13 93.7(4)   | C7 C8 C9 118.7(4)   | N3 N4 C4 100.0(4)  |
| C13 C14 C15 120.5(4) | N8 N7 C10 92.4(4)   | C5 C4 C9 120.4(4)   | C1 N2 C3 106.6(3)  |
| C16 C15 C14 117.8(4) | C10 N6 C11 106.6(4) | C5 C4 N4 111.5(4)   | N4 N3 C1 100.1(4)  |
| C18 C13 C14 121.0(4) | C10 N5 C12 106.1(3) | C9 C4 N4 128.0(4)   | C1 N1 C2 106.5(3)  |
| C18 C13 N8 108.1(4)  | C8 C7 C6 120.6(3)   | C2 C3 N2 106.7(3)   | N9 C19 S1 178.7(4) |
| C14 C13 N8 130.7(5)  | C8 C7 Br1 120.4(3)  | C11 C12 N5 109.8(4) |                    |
| <b>Salt 2</b>        |                     |                     |                    |
| I1 C7 2.096(4)       | C3 N2 1.357(5)      | C5 C4 1.400(5)      |                    |
| C1 N1 1.325(5)       | N4 N3 1.264(4)      | C4 C9 1.392(5)      |                    |
| C1 N2 1.340(4)       | N4 C4 1.412(5)      | C8 C9 1.384(5)      |                    |
| C1 N3 1.389(5)       | C7 C8 1.386(5)      | O2 N5 1.236(4)      |                    |
| C2 C3 1.327(6)       | C7 C6 1.388(5)      | O3 N5 1.255(4)      |                    |
| C2 N1 1.366(5)       | C5 C6 1.364(5)      | O4 N5 1.220(4)      |                    |
| N1 C1 N2 108.2(3)    | N4 N3 C1 110.7(3)   | C5 C4 N4 125.0(3)   |                    |
| N1 C1 N3 129.6(3)    | C8 C7 C6 120.2(3)   | C9 C8 C7 119.9(3)   |                    |
| N2 C1 N3 122.3(3)    | C8 C7 I1 119.5(3)   | C8 C9 C4 119.3(3)   |                    |
| C3 C2 N1 108.2(4)    | C6 C7 I1 120.2(3)   | C5 C6 C7 120.7(4)   |                    |
| C2 C3 N2 107.3(3)    | C6 C5 C4 119.2(3)   | O4 N5 O2 120.1(4)   |                    |
| C1 N1 C2 107.9(4)    | C9 C4 C5 120.6(3)   | O4 N5 O3 121.6(3)   |                    |
| C1 N2 C3 108.4(3)    | C9 C4 N4 114.5(3)   | O2 N5 O3 118.3(3)   |                    |
| N3 N4 C4 114.9(3)    |                     |                     |                    |
| <b>Salt 3</b>        |                     |                     |                    |
| I1 C1 2.094(4)       | C4 C5 1.368(5)      |                     |                    |
| Cl1 O4 1.399(3)      | C4 C6 1.391(5)      | C7 N5 1.332(5)      |                    |
| Cl1 O3 1.404(3)      | C2 C3 1.381(5)      | C7 N3 1.391(5)      |                    |
| Cl1 O2 1.418(3)      | C3 C6 1.378(5)      | C9 C8 1.355(5)      |                    |
| Cl1 O1 1.421(4)      | C6 N1 1.411(5)      | C9 N4 1.365(5)      |                    |
| C1 C2 1.381(5)       | N1 N3 1.256(4)      | C8 N5 1.362(5)      |                    |
| C1 C5 1.394(5)       | C7 N4 1.324(4)      |                     |                    |
| O4 Cl1 O3 110.6(2)   | C5 C4 C6 119.8(3)   | N4 C7 N5 108.0(3)   |                    |
| O4 Cl1 O2 112.7(2)   | C4 C5 C1 119.9(3)   | N4 C7 N3 121.7(3)   |                    |
| O3 Cl1 O2 109.3(2)   | C1 C2 C3 119.6(3)   | N5 C7 N3 130.3(3)   |                    |
| O4 Cl1 O1 107.1(3)   | C6 C3 C2 120.2(3)   | N1 N3 C7 111.8(3)   |                    |
| O3 Cl1 O1 109.8(3)   | C3 C6 C4 120.2(3)   | C8 C9 N4 106.9(3)   |                    |
| O2 Cl1 O1 107.2(3)   | C3 C6 N1 115.6(3)   | C9 C8 N5 106.9(4)   |                    |
| C2 C1 C5 120.2(3)    | C4 C6 N1 124.2(3)   | C7 N5 C8 109.0(3)   |                    |
| C2 C1 I1 120.2(3)    | N3 N1 C6 113.9(3)   | C7 N4 C9 109.1(3)   |                    |
| C5 C1 I1 119.6(3)    |                     |                     |                    |
| <b>Salt 4</b>        |                     |                     |                    |

|                       |                      |                      |                      |
|-----------------------|----------------------|----------------------|----------------------|
| C13 C8 1.411(3)       | C5 C6 1.390(3)       | C2 C3 1.342(3)       |                      |
| C13 C4 1.416(3)       | C11 C10 1.397(3)     | C2 N1 1.353(3)       |                      |
| C13 C12 1.430(3)      | C9 C10 1.346(3)      | C3 N2 1.353(3)       |                      |
| C4 C5 1.370(3)        | C6 C7 1.357(3)       | N3 N4 1.259(2)       |                      |
| C4 N4 1.425(2)        | C1 N1 1.320(2)       | N5 O2 1.203(2)       |                      |
| C8 C9 1.412(3)        | C1 N2 1.327(2)       | N5 O1 1.217(2)       |                      |
| C8 C7 1.425(3)        | C1 N3 1.383(2)       | N5 O3 1.236(2)       |                      |
| C12 C11 1.370(3)      |                      |                      |                      |
| C8 C13 C4 118.19(18)  | C13 C8 C7 119.4(2)   | C9 C10 C11 120.4(2)  | N3 N4 C4 114.30(16)  |
| C8 C13 C12 118.53(19) | C9 C8 C7 121.0(2)    | N1 C1 N2 107.73(19)  | C1 N1 C2 109.21(18)  |
| C4 C13 C12 123.28(19) | C11 C12 C13 119.3(2) | N1 C1 N3 121.44(19)  | C1 N2 C3 108.83(18)  |
| C5 C4 C13 120.72(19)  | C4 C5 C6 120.8(2)    | N2 C1 N3 130.83(19)  | C6 C7 C8 120.3(2)    |
| C5 C4 N4 123.49(19)   | C12 C11 C10 121.4(2) | C3 C2 N1 107.0(2)    | O2 N5 O1 119.6(2)    |
| C13 C4 N4 115.79(17)  | C10 C9 C8 120.8(2)   | C2 C3 N2 107.2(2)    | O2 N5 O3 122.0(2)    |
| C13 C8 C9 119.6(2)    | C7 C6 C5 120.5(2)    | N4 N3 C1 112.11(16)  | O1 N5 O3 118.5(2)    |
| <b>Salt 5</b>         |                      |                      |                      |
| C10 C1 1.415(5)       | C7 C8 1.403(6)       | C23 C14 1.436(5)     | C24 N6 1.318(5)      |
| C10 C9 1.422(5)       | C11 N4 1.330(5)      | C14 C15 1.384(5)     | C24 N5 1.328(5)      |
| C10 C5 1.429(5)       | C11 N3 1.349(5)      | C14 N8 1.407(5)      | C24 N7 1.395(5)      |
| C1 C2 1.363(5)        | C11 N2 1.394(5)      | C18 C17 1.414(6)     | C26 C25 1.354(6)     |
| C1 N1 1.419(5)        | C12 C13 1.336(6)     | C18 C19 1.414(5)     | C26 N6 1.358(5)      |
| C5 C4 1.412(6)        | C12 N4 1.380(6)      | C19 C20 1.343(6)     | C25 N5 1.370(6)      |
| C5 C6 1.414(5)        | C13 N3 1.352(5)      | C15 C16 1.399(7)     | N8 N7 1.258(4)       |
| C9 C8 1.363(6)        | N2 N1 1.267(4)       | C22 C21 1.369(6)     | O8 N11 1.256(4)      |
| C6 C7 1.361(6)        | C23 C22 1.409(6)     | C20 C21 1.383(6)     | N11 O9 1.189(4)      |
| C2 C3 1.395(6)        | C23 C18 1.416(6)     | C17 C16 1.357(6)     | N11 O10 1.234(4)     |
| C4 C3 1.352(5)        |                      |                      |                      |
| C1 C10 C9 123.7(4)    | C9 C8 C7 120.1(4)    | C18 C23 C14 118.1(4) | C17 C16 C15 121.0(5) |
| C1 C10 C5 118.1(4)    | C4 C3 C2 120.3(4)    | C15 C14 N8 124.0(4)  | N6 C24 N5 110.9(4)   |
| C9 C10 C5 118.2(4)    | N4 C11 N3 110.0(4)   | C15 C14 C23 120.1(4) | N6 C24 N7 120.8(4)   |
| C2 C1 C10 120.8(4)    | N4 C11 N2 120.8(4)   | N8 C14 C23 115.8(3)  | N5 C24 N7 128.2(4)   |
| C2 C1 N1 124.0(4)     | N3 C11 N2 129.1(4)   | C17 C18 C19 121.4(4) | C25 C26 N6 107.4(4)  |
| C10 C1 N1 115.1(3)    | C13 C12 N4 111.0(4)  | C17 C18 C23 119.8(4) | C26 C25 N5 107.8(4)  |
| C4 C5 C6 121.8(4)     | C12 C13 N3 105.6(4)  | C19 C18 C23 118.7(4) | N7 N8 C14 115.6(4)   |
| C4 C5 C10 118.8(4)    | N1 N2 C11 112.0(3)   | C20 C19 C18 120.8(5) | N8 N7 C24 111.9(4)   |
| C6 C5 C10 119.4(4)    | N2 N1 C1 114.2(3)    | C14 C15 C16 120.2(4) | C24 N6 C26 107.5(4)  |
| C8 C9 C10 120.9(5)    | C11 N4 C12 104.7(3)  | C21 C22 C23 119.4(5) | C24 N5 C25 106.4(4)  |
| C7 C6 C5 120.0(4)     | C11 N3 C13 108.8(4)  | C19 C20 C21 120.5(4) | O9 N11 O10 117.2(4)  |
| C1 C2 C3 120.8(4)     | C22 C23 C18 119.1(4) | C16 C17 C18 120.6(5) | O9 N11 O8 126.4(5)   |
| C3 C4 C5 121.1(4)     | C22 C23 C14 122.9(4) | C22 C21 C20 121.5(4) | O10 N11 O8 116.4(4)  |
| C6 C7 C8 121.4(4)     |                      |                      |                      |

**Table S2.** Observed Non-covalent interactions in salt **1-5**.

| D-H...A       | H...A (Å)  | D...A (Å) | D-H...A (°) |
|---------------|------------|-----------|-------------|
| <b>Salt 1</b> |            |           |             |
| N1-H1N...O1   | 1.839 (40) | 2.696 (5) | 173.88 (26) |
| O1-H1O...N9   | 2.126 (70) | 2.915 (6) | 163.85 (95) |
| O1-H2O...N9   | 2.035 (45) | 2.843 (6) | 162.72 (61) |
| N5-H5N...N2   | 1.884 (3)  | 2.740 (5) | 173.33 (26) |
| N6-H6N...N8   | 2.573 (5)  | 2.616 (7) | 83.31 (32)  |
| N5-H5N...N2   | 1.884 (3)  | 2.740 (5) | 173.33 (26) |
| <b>Salt 2</b> |            |           |             |
| N1-H1N...O1   | 1.851 (43) | 2.656 (5) | 160.35 (15) |
| O1-H1O...O3   | 1.942 (61) | 2.753 (5) | 175.95 (99) |
| O1-H2O...O3   | 2.109 (52) | 2.806 (5) | 150.51 (24) |
| N2-H2N...O2   | 1.807 (46) | 2.705 (5) | 173.41 (37) |
| N2-H2N...O4   | 2.634 (43) | 3.188 (5) | 120.54 (48) |

|               |            |             |             |
|---------------|------------|-------------|-------------|
| O1–H2O···O2   | 2.779 (58) | 3.405 (8)   | 139.87 (9)  |
| N1–H1N···N4   | 2.500 (40) | 2.684 (4)   | 93.43 ( 84) |
| <b>Salt 3</b> |            |             |             |
| O5–H1O···O1   | 2.201 (10) | 3.037 (6)   | 129.24 (98) |
| O5–H5O···O1   | 2.110 (63) | 2.895 (6)   | 154.09 (69) |
| N4–H4N···O5   | 1.988 (45) | 2.773 (4)   | 162.80 (48) |
| N5–H3N···O2   | 2.001 (41) | 2.896 (5)   | 170.57 (75) |
| N5–H3N···N1   | 2.630 (40) | 2.724 (5)   | 86.21 (48)  |
| <b>Salt 4</b> |            |             |             |
| N1–H1N···O3   | 1.845 (2)  | 2.703 (2)   | 174.72 (13) |
| N2–H2N···O1   | 2.364 (2)  | 2.913 (3)   | 165.98 (12) |
| N4–H4···N2    | 2.613 (2)  | 2.729 (3)   | 88.46 (13)  |
| <b>Salt 5</b> |            |             |             |
| N6–H6N···N1   | 1.815 (38) | 2.685(.005) | 177.74 (79) |
| N5–H5N···O4   | 1.754 (50) | 2.818(.004) | 160.93 (49) |
| O4–HOB···O2   | 1.778 (40) | 2.841(.005) | 170.10 (24) |
| O4–HOA···O3   | 1.947 (46) | 2.923(.004) | 158.89 (92) |
| N2–H2N···O1   | 2.340 (29) | 3.166(.005) | 169.47 (81) |
| N2–H2N···O2   | 2.472 (30) | 3.078(.005) | 130.17 (53) |
| N2–H2N···N4   | 2.647 (37) | 2.726(.005) | 86.40 (44)  |
| N5–H5N···N8   | 2.553 (68) | 2.687(.005) | 84.81 (48)  |
| O4–HOB···O3   | 2.346 (37) | 3.139(.004) | 129.41 (66) |
| O4–HOB···N9   | 2.422 (40) | 3.450(.006) | 159.82 (86) |
| N2–H2N···N2   | 2.797 (29) | 3.567(.005) | 154.12 (62) |
| O4–HOA···N9   | 2.854 (43) | 3.864(.005) | 170.24 (48) |

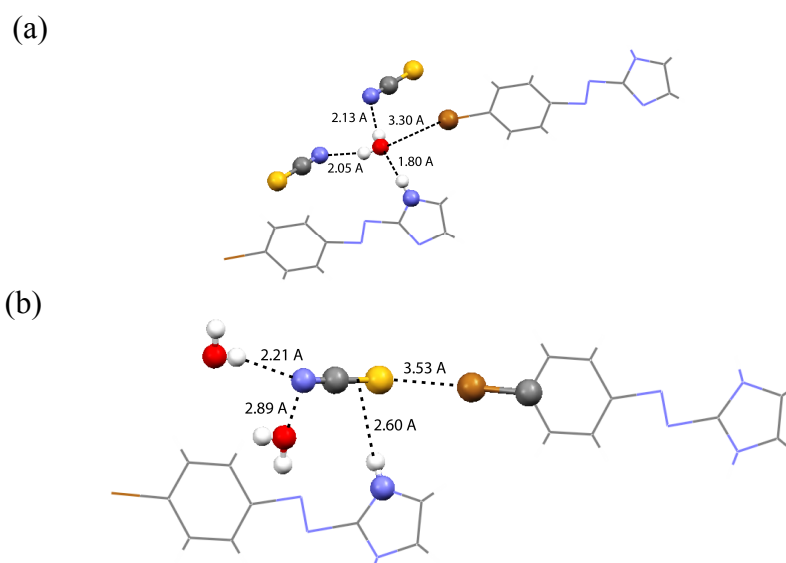

**Figure S1.** Hydrogen bonding pattern of (a) crystal water and (b)  $\text{SCN}^-$  anion in salt 1.

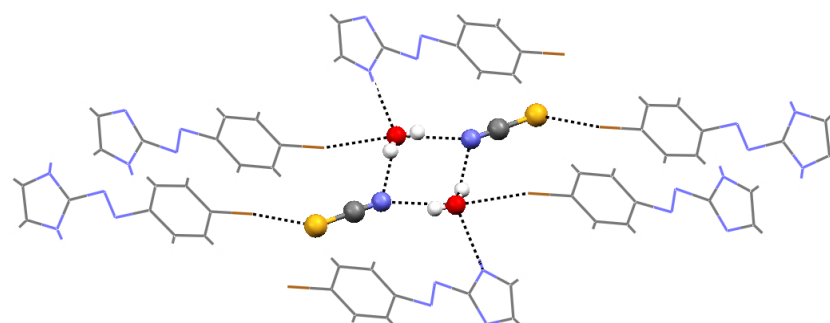

**Figure S2.** Water-thiocyanate-water-thiocyanate tetramer in salt 1.

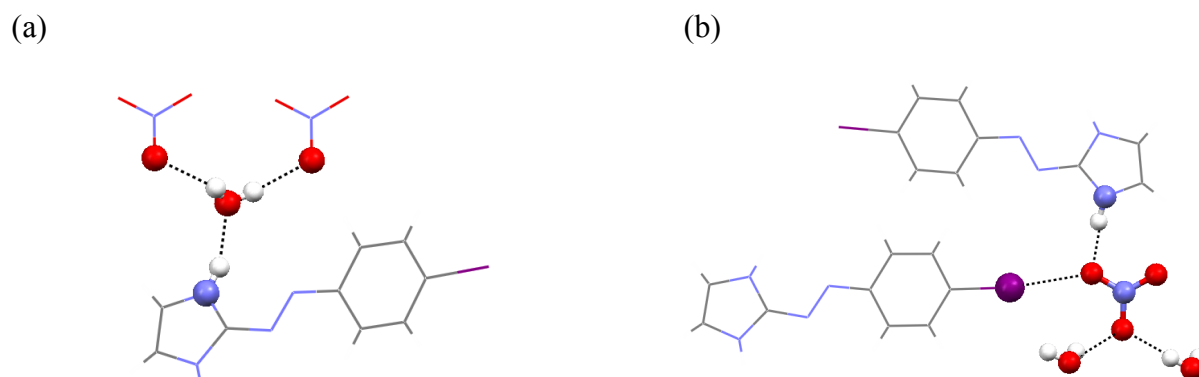

**Figure S3.** Hydrogen bonding pattern of (a) crystal water and (b)  $\text{NO}_3^-$  anion in salt 2.

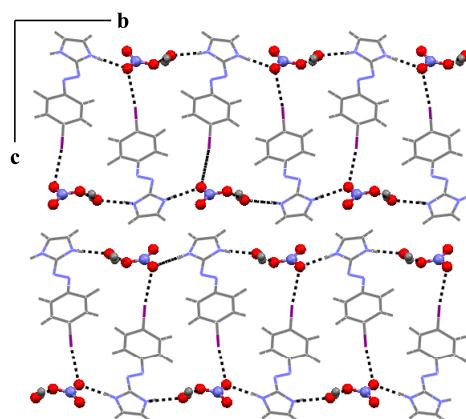

**Figure S4.** Packing of salt 2 along *a* axis.

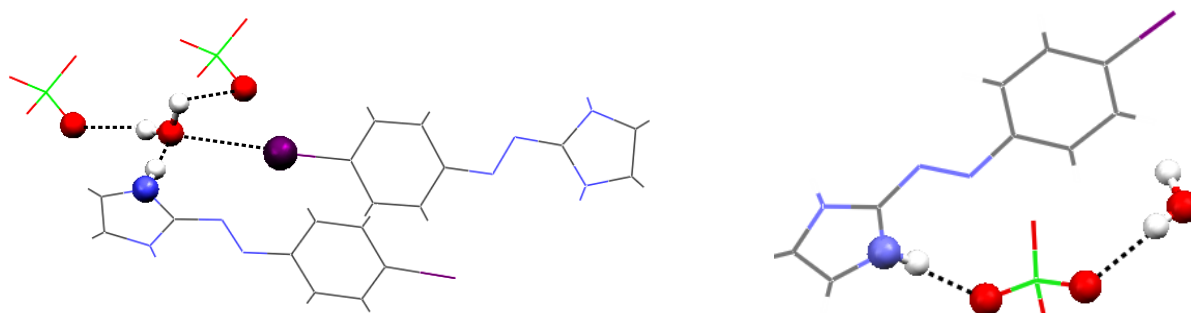

**Figure S5.** Hydrogen bonding pattern of (a) crystal water and (b)  $\text{ClO}_4^-$  anion in salt 3.

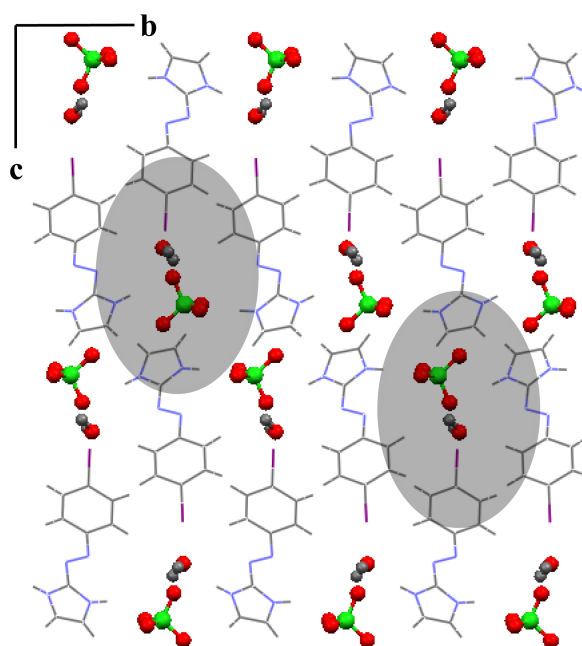

**Figure S6.** Elliptical pocket for anion and water in salt **3** along *a* axis.

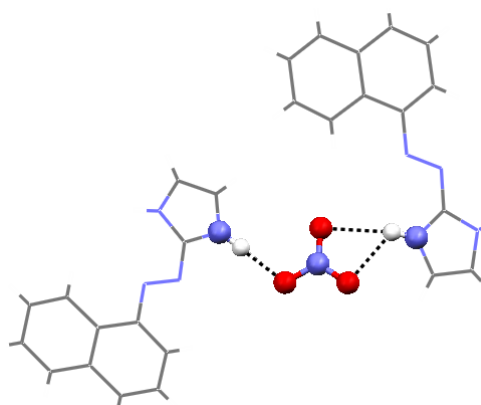

**Figure S7.** Hydrogen bonding pattern of anion in salt **4**.

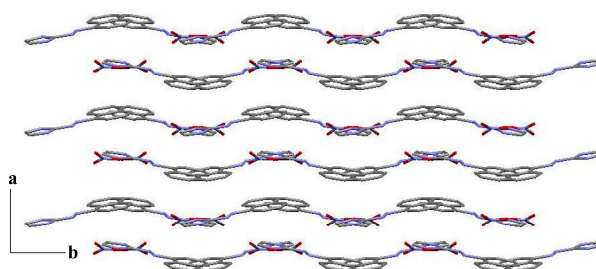

**Figure S8.** Packing of salt **4** along *c* axis.

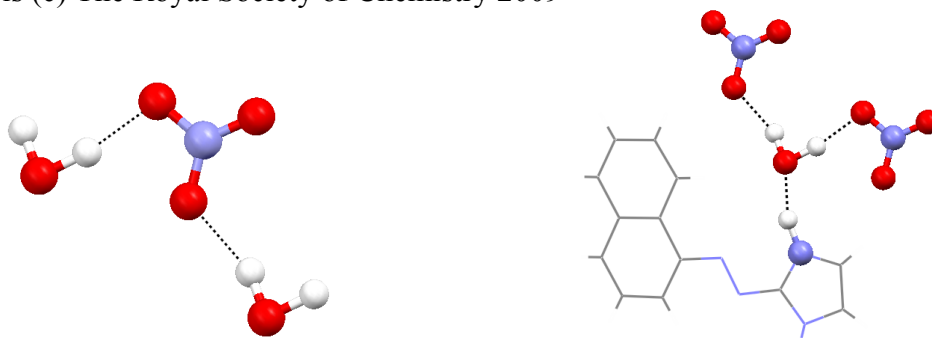

**Figure S9.** Hydrogen bonding pattern of (a) crystal water and (b) ClO<sub>4</sub><sup>-</sup> anion in salt **5**.

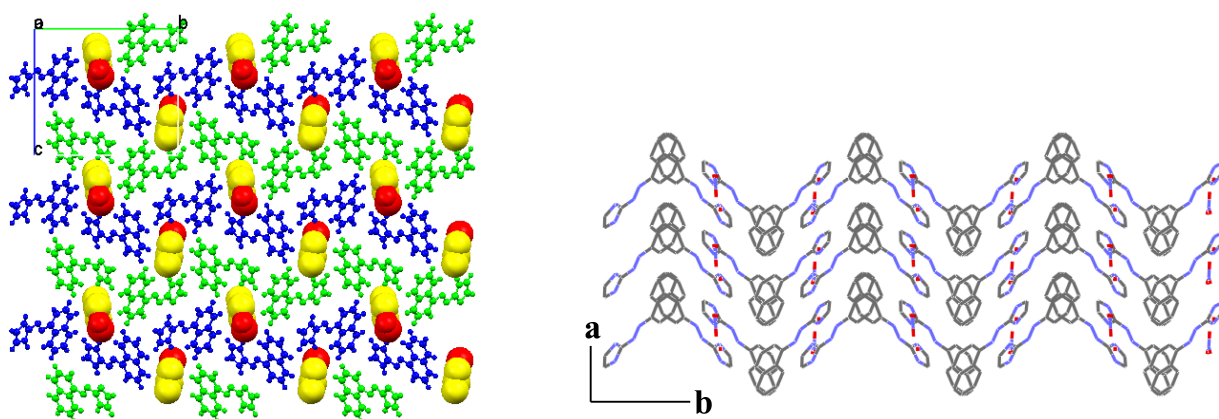

**Figure S10.** Packing of salt **5** along *a* axis and *c* axis.

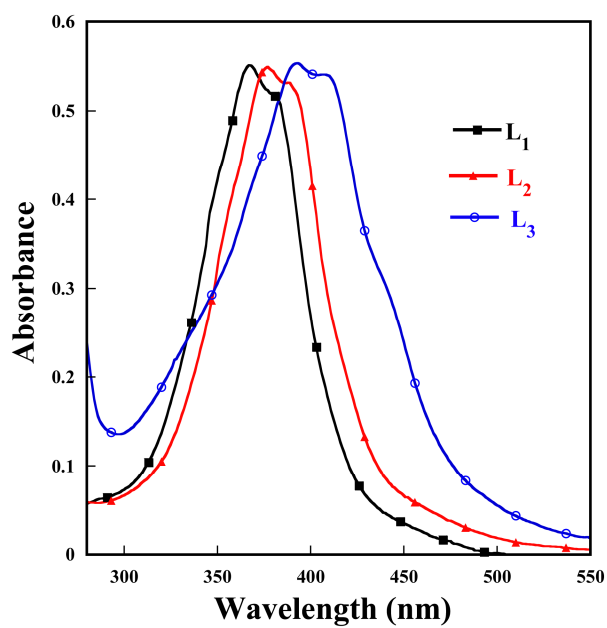

**Figure S11.** UV-vis absorption spectra of L<sub>1-3</sub>.

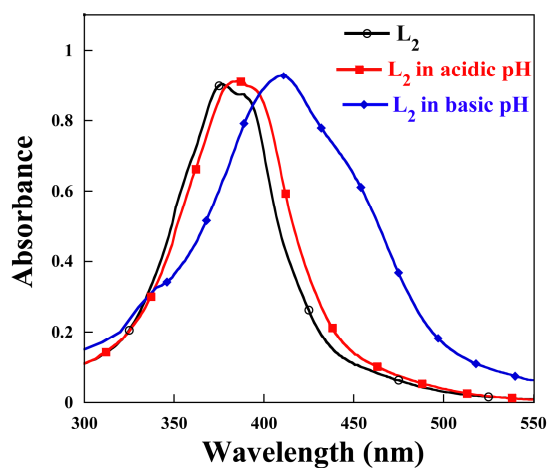

**Figure S12.** UV-vis absorption spectra of L<sub>2</sub> in presence of acid and base.

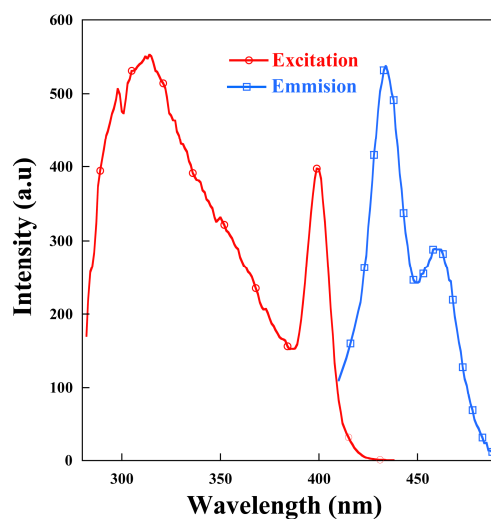

**Figure S13.** Excitation and emission spectra of L<sub>3</sub>.

**Table S3.** Fluorescence quantum yield of L<sub>3</sub> with different anionic input.

| Sr. No. | Anionic input                                | $\Phi_F$ | $\Phi_F - \Phi_q$ |
|---------|----------------------------------------------|----------|-------------------|
| 1       | Nil                                          | 0.025    | 0.000             |
| 2       | Br <sup>-</sup>                              | 0.019    | 0.006             |
| 3       | Cl <sup>-</sup>                              | 0.022    | 0.003             |
| 4       | SCN <sup>-</sup>                             | 0.018    | 0.007             |
| 5       | NO <sub>3</sub> <sup>-</sup>                 | 0.014    | 0.011             |
| 6       | ClO <sub>4</sub> <sup>-</sup>                | 0.001    | 0.024             |
| 7       | CH <sub>3</sub> COO <sup>-</sup>             | 0.016    | 0.009             |
| 8       | CF <sub>3</sub> SO <sub>3</sub> <sup>-</sup> | 0.014    | 0.008             |



|   |                              |       |       |
|---|------------------------------|-------|-------|
| 9 | BF <sub>4</sub> <sup>-</sup> | 0.020 | 0.005 |
|---|------------------------------|-------|-------|

**Table S4.** Fluorescence quantum yield of L<sub>3</sub> with different concentration of ClO<sub>4</sub><sup>-</sup>.

| Sr. No. | [ClO <sub>4</sub> <sup>-</sup> ] (M) | Φ <sub>q</sub> | Φ <sub>F</sub> /Φ <sub>q</sub> |
|---------|--------------------------------------|----------------|--------------------------------|
| 1       | 4 x 10 <sup>-6</sup>                 | 0.0060         | 3.5000                         |
| 2       | 8 x 10 <sup>-6</sup>                 | 0.0031         | 6.7000                         |
| 3       | 12 x 10 <sup>-6</sup>                | 0.0025         | 8.3000                         |
| 4       | 16 x 10 <sup>-6</sup>                | 0.0018         | 11.700                         |
| 5       | 20 x 10 <sup>-6</sup>                | 0.0016         | 13.000                         |
| 6       | 24 x 10 <sup>-6</sup>                | 0.0013         | 16.000                         |
| 7       | 28 x 10 <sup>-6</sup>                | 0.0011         | 18.900                         |
| 8       | 32 x 10 <sup>-6</sup>                | 0.0010         | 21.000                         |

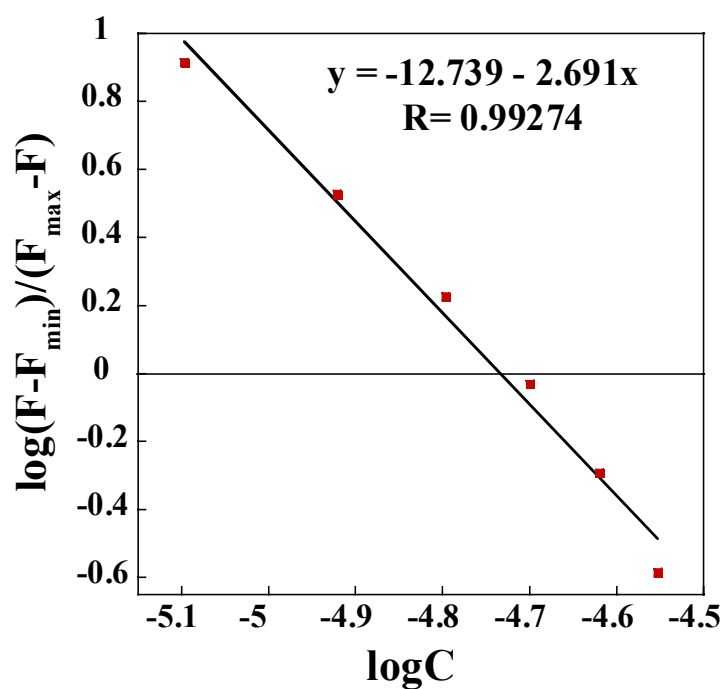

**Figure S14.** Determination dissociation constant ( $K_d$ ). The apparent  $K_d$  is at the X intercept, at a value of  $-4.73$ . The inverse log of this is  $1.9 \times 10^{-5}$  M.

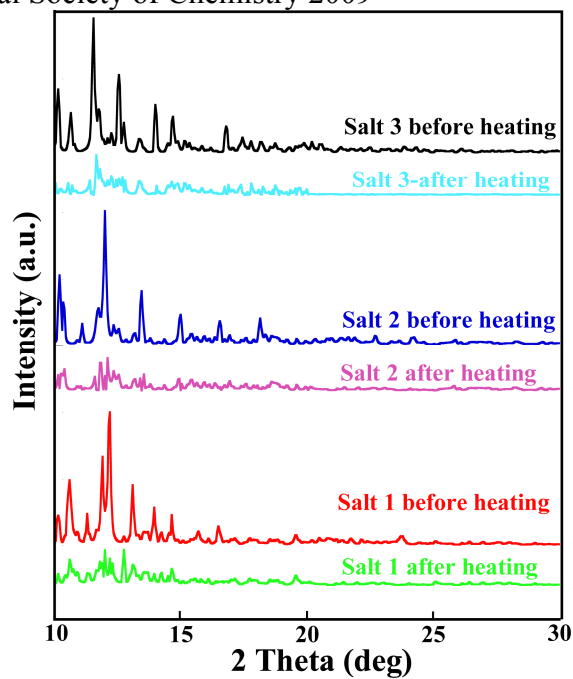

**Figure S15.** PXRD patterns of crystalline salt 1, salt 2 and salt 3 before and after heating.

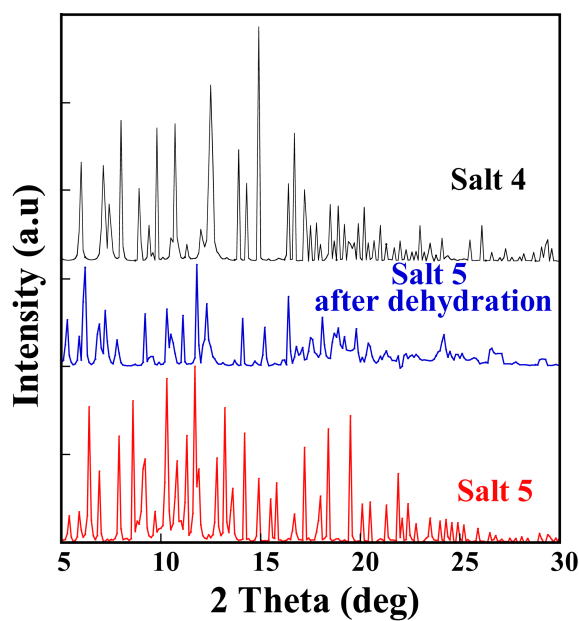

**Figure S16.** PXRD patterns of crystalline salt 4, salt 5 and salt 5 after removal of water.
